# Supplementary material
Source: bioRxiv or medRxiv preprint supplement (https://medrxiv.org/highwire/filestream/81562/field_highwire_adjunct_files/3/2020.05.15.20101097-4.pdf)
Supplement: Supplementary file [file 2020.05.15.20101097-4.pdf]

| <i>Country/territory</i>         | <i>Capital city</i> | <i>Date<br/>(first reported case)</i> | <i>Total cases</i> | <i>Total deaths</i> | <i>Cumulative cases<br/>(day 28)</i> |
|----------------------------------|---------------------|---------------------------------------|--------------------|---------------------|--------------------------------------|
| Afghanistan                      | Kabul               | 2/25/20                               | 2,335              | 68                  | 34                                   |
| Albania                          | Tirana              | 3/9/20                                | 782                | 31                  | 333                                  |
| Algeria                          | Algiers             | 2/26/20                               | 4,154              | 453                 | 230                                  |
| Andorra                          | Andorra la Vella    | 3/3/20                                | 746                | 43                  | 334                                  |
| Angola                           | Luanda              | 3/22/20                               | 29                 | 2                   | 19                                   |
| Anguilla                         | The Valley          | 3/27/20                               | 3                  | 0                   | 3                                    |
| Antigua                          | St. John's          | 3/15/20                               | 25                 | 3                   | 21                                   |
| Argentina                        | Buenos Aires        | 3/4/20                                | 4,519              | 225                 | 966                                  |
| Armenia                          | Yerevan             | 3/1/20                                | 2,148              | 33                  | 372                                  |
| Aruba                            | Oranjestad          | 3/13/20                               | 100                | 2                   | 77                                   |
| Australia                        | Canberra            | 1/25/20                               | 6,767              | 93                  | 17                                   |
| Austria                          | Vienna              | 2/26/20                               | 15,531             | 589                 | 4,486                                |
| Azerbaijan                       | Baku                | 2/29/20                               | 1,854              | 25                  | 122                                  |
| Bahamas                          | Nassau              | 3/16/20                               | 82                 | 11                  | 46                                   |
| Bahrain                          | Manama              | 2/24/20                               | 3,170              | 8                   | 306                                  |
| Bangladesh                       | Dhaka               | 3/9/20                                | 8,238              | 170                 | 70                                   |
| Barbados                         | Bridgetown          | 3/18/20                               | 81                 | 7                   | 72                                   |
| Belarus                          | Minsk               | 2/28/20                               | 14,917             | 93                  | 86                                   |
| Belgium                          | Brussels            | 2/4/20                                | 49,032             | 7,703               | 2                                    |
| Belize                           | Belmopan            | 3/24/20                               | 18                 | 2                   | 18                                   |
| Benin                            | Cotonou             | 3/17/20                               | 90                 | 2                   | 35                                   |
| Bermuda                          | Hamilton            | 3/20/20                               | 114                | 6                   | 81                                   |
| Bhutan                           | Thimphu             | 3/6/20                                | 7                  | 0                   | 5                                    |
| Bolivia                          | La Paz              | 3/12/20                               | 1,229              | 66                  | 210                                  |
| Bonaire                          |                     | 4/2/20                                | 6                  | 0                   | 6                                    |
| Bosnia and Herzegovina           | Sarajevo            | 3/6/20                                | 1,781              | 70                  | 464                                  |
| Botswana                         | Gaborone            | 4/1/20                                | 23                 | 1                   | 22                                   |
| Brazil                           | Brasília            | 2/26/20                               | 91,589             | 6,329               | 1,891                                |
| British Virgin Islands           | Road Town           | 3/27/20                               | 6                  | 1                   | 5                                    |
| Brunei                           | Bandar Seri Begawan | 3/10/20                               | 138                | 1                   | 135                                  |
| Bulgaria                         | Sofia               | 3/8/20                                | 1,588              | 69                  | 485                                  |
| Burkina Faso                     | Ouagadougou         | 3/11/20                               | 649                | 44                  | 364                                  |
| Burundi                          | Gitega              | 4/1/20                                | 15                 | 1                   | 15                                   |
| Cambodia                         | Phnom Penh          | 1/28/20                               | 122                | 0                   | 1                                    |
| Cameroon                         | Yaoundé             | 3/7/20                                | 2,069              | 61                  | 271                                  |
| Canada                           | Ottawa              | 1/26/20                               | 55,061             | 3,391               | 9                                    |
| Cape Verde                       | Praia               | 3/21/20                               | 123                | 2                   | 55                                   |
| Cayman Islands                   | George Town         | 3/20/20                               | 74                 | 1                   | 60                                   |
| Central African Republic         | Bangui              | 3/16/20                               | 72                 | 0                   | 11                                   |
| Chad                             | N'Djamena           | 3/20/20                               | 73                 | 5                   | 27                                   |
| Chile                            | Santiago            | 3/4/20                                | 17,008             | 234                 | 2,449                                |
| China                            | Beijing             | 12/31/19                              | 83,959             | 4,637               | 2,775                                |
| Colombia                         | Bogotá              | 3/7/20                                | 7,006              | 314                 | 1,161                                |
| Republic of Congo                | Brazzaville         | 3/16/20                               | 229                | 10                  | 60                                   |
| Costa Rica                       | San José            | 3/7/20                                | 725                | 6                   | 396                                  |
| Ivory Coast                      | Yamoussoukro        | 3/12/20                               | 1,333              | 15                  | 349                                  |
| Croatia                          | Zagreb              | 2/26/20                               | 2,085              | 75                  | 306                                  |
| Cuba                             | Havana              | 3/12/20                               | 1,537              | 64                  | 396                                  |
| Curacao                          | Willemstad          | 3/13/20                               | 16                 | 1                   | 14                                   |
| Cyprus                           | Nicosia             | 3/10/20                               | 857                | 20                  | 446                                  |
| Czech Republic                   | Prague              | 3/2/20                                | 7,737              | 240                 | 2,663                                |
| Denmark                          | Copenhagen          | 2/27/20                               | 9,311              | 460                 | 1,591                                |
| Djibouti                         | Djibouti            | 3/19/20                               | 1,097              | 2                   | 363                                  |
| Dominica                         | Roseau              | 3/23/20                               | 16                 | 0                   | 16                                   |
| Dominican Republic               | Santo Domingo       | 3/2/20                                | 7,288              | 313                 | 719                                  |
| Democratic Republic of the Congo | Kinshasa            | 3/11/20                               | 604                | 32                  | 161                                  |
| East Timor (Timor-Leste)         | Dili                | 3/22/20                               | 24                 | 0                   | 18                                   |
| Ecuador                          | Quito               | 3/1/20                                | 26,336             | 1,063               | 1,627                                |
| Egypt                            | Cairo               | 2/15/20                               | 5,895              | 406                 | 80                                   |
| El Salvador                      | San Salvador        | 3/19/20                               | 446                | 10                  | 159                                  |
| Equatorial Guinea                | Malabo              | 3/15/20                               | 315                | 1                   | 18                                   |
| Eritrea                          | Asmara              | 3/22/20                               | 39                 | 0                   | 35                                   |
| Estonia                          | Tallinn             | 2/28/20                               | 1,694              | 52                  | 404                                  |
| Swaziland                        | Mbabane             | 3/15/20                               | 106                | 1                   | 12                                   |
| Ethiopia                         | Addis Ababa         | 3/14/20                               | 133                | 3                   | 56                                   |
| Falkland Islands                 | Stanley             | 4/4/20                                | 13                 | 0                   | 13                                   |
| Faroe Islands                    | Tórshavn            | 3/20/20                               | 187                | 0                   | 184                                  |
| Fiji                             | Suva                | 3/20/20                               | 18                 | 0                   | 16                                   |

|                  |                    |         |         |        |        |
|------------------|--------------------|---------|---------|--------|--------|
| Finland          | Helsinki           | 1/30/20 | 5,051   | 218    | 1      |
| France           | Paris              | 1/25/20 | 130,185 | 24,594 | 12     |
| French Polynesia | Papeete            | 3/19/20 | 58      | 0      | 55     |
| Gabon            | Libreville         | 3/13/20 | 308     | 4      | 33     |
| Gambia           | Banjul             | 3/18/20 | 12      | 1      | 9      |
| Georgia          | Tbilisi (official) | 2/27/20 | 582     | 8      | 70     |
| Germany          | Berlin             | 1/28/20 | 161,703 | 6,575  | 15     |
| Ghana            | Accra              | 3/13/20 | 2,074   | 17     | 313    |
| Gibraltar        | Gibraltar          | 3/20/20 | 144     | 0      | 131    |
| Greece           | Athens             | 2/27/20 | 2,591   | 140    | 743    |
| Greenland        | Nuuk               | 3/20/20 | 11      | 0      | 11     |
| Grenada          | St. George's       | 3/23/20 | 20      | 0      | 14     |
| Guam             | Hagåtña            | 3/19/20 | 146     | 5      | 135    |
| Guatemala        | Guatemala City     | 3/15/20 | 644     | 16     | 137    |
| Guernsey         | St. Peter Port     | 3/20/20 | 252     | 13     | 223    |
| Guinea           | Conakry            | 3/14/20 | 1,537   | 7      | 194    |
| Guinea-Bissau    | Bissau             | 3/27/20 | 257     | 1      | 50     |
| Guyana           | Georgetown         | 3/13/20 | 82      | 9      | 37     |
| Haiti            | Port-au-Prince     | 3/20/20 | 85      | 8      | 41     |
| Honduras         | Tegucigalpa        | 3/12/20 | 899     | 75     | 312    |
| Hungary          | Budapest           | 3/5/20  | 2,942   | 335    | 525    |
| Iceland          | Reykjavik          | 2/29/20 | 1,798   | 10     | 802    |
| India            | New Delhi          | 1/30/20 | 37,336  | 1,218  | 3      |
| Indonesia        | Jakarta            | 3/2/20  | 10,551  | 800    | 1,155  |
| Iran             | Tehran             | 2/20/20 | 95,646  | 6,091  | 16,169 |
| Iraq             | Baghdad            | 2/25/20 | 2,153   | 94     | 233    |
| Ireland          | Dublin             | 3/1/20  | 20,833  | 1,265  | 2,121  |
| Isle of Man      | Douglas            | 3/21/20 | 316     | 22     | 284    |
| Israel           | Jerusalem          | 2/22/20 | 16,101  | 225    | 677    |
| Italy            | Rome               | 1/31/20 | 207,428 | 28,236 | 400    |
| Jamaica          | Kingston           | 3/12/20 | 432     | 8      | 63     |
| Japan            | Tokyo              | 1/15/20 | 14,544  | 458    | 25     |
| Jersey           | St. Helier         | 3/20/20 | 286     | 24     | 217    |
| Jordan           | Amman              | 3/3/20  | 459     | 8      | 259    |
| Kazakhstan       | Nur-Sultan         | 3/15/20 | 3,671   | 25     | 840    |
| Kenya            | Nairobi            | 3/14/20 | 411     | 21     | 184    |
| Kosovo           | Pristina           | 3/16/20 | 813     | 22     | 283    |
| Kuwait           | Kuwait City        | 2/24/20 | 4,377   | 30     | 176    |
| Kyrgyzstan       | Bishkek            | 3/19/20 | 769     | 8      | 449    |
| Laos             | Vientiane          | 3/25/20 | 19      | 0      | 19     |
| Latvia           | Riga               | 3/3/20  | 870     | 16     | 376    |
| Lebanon          | Beirut             | 2/22/20 | 729     | 24     | 149    |
| Liberia          | Monrovia           | 3/17/20 | 152     | 18     | 50     |
| Libya            | Tripoli            | 3/25/20 | 63      | 3      | 51     |
| Liechtenstein    | Vaduz              | 3/5/20  | 83      | 1      | 68     |
| Lithuania        | Vilnius            | 2/28/20 | 1,399   | 45     | 274    |
| Luxembourg       | Luxembourg         | 3/1/20  | 3,802   | 92     | 1,605  |
| Madagascar       | Antananarivo       | 3/21/20 | 135     | 0      | 111    |
| Malawi           | Lilongwe           | 4/3/20  | 37      | 3      | 36     |
| Malaysia         | Kuala Lumpur       | 1/25/20 | 6,071   | 103    | 22     |
| Maldives         | Malé               | 3/8/20  | 491     | 1      | 19     |
| Mali             | Bamako             | 3/26/20 | 508     | 26     | 258    |
| Malta            | Valletta           | 3/8/20  | 467     | 4      | 202    |
| Mauritania       | Nouakchott         | 3/15/20 | 8       | 1      | 7      |
| Mauritius        | Port Louis         | 3/20/20 | 334     | 10     | 324    |
| Mexico           | Mexico City        | 2/29/20 | 20,739  | 1,972  | 585    |
| Moldova          | Chi_in_u           | 3/8/20  | 3,980   | 122    | 591    |
| Monaco           | Monaco             | 2/29/20 | 95      | 4      | 33     |
| Mongolia         | Ulan Bator         | 3/10/20 | 39      | 0      | 14     |
| Montenegro       | Podgorica          | 3/18/20 | 322     | 7      | 274    |
| Montserrat       | Brades Estate      | 3/21/20 | 11      | 1      | 11     |
| Morocco          | Rabat              | 3/3/20  | 4,569   | 171    | 479    |
| Mozambique       | Maputo             | 3/23/20 | 79      | 0      | 35     |
| Myanmar          | Naypyidaw          | 3/24/20 | 151     | 6      | 111    |
| Namibia          | Windhoek           | 3/15/20 | 16      | 0      | 16     |
| Nepal            | Kathmandu          | 1/25/20 | 59      | 0      | 1      |
| Netherlands      | Amsterdam          | 2/28/20 | 39,791  | 4,893  | 6,412  |
| New Caledonia    | Nouméa             | 3/21/20 | 18      | 0      | 18     |
| New Zealand      | Wellington         | 2/28/20 | 1,134   | 20     | 262    |
| Nicaragua        | Managua            | 3/19/20 | 14      | 4      | 9      |
| Niger            | Niamey             | 3/21/20 | 728     | 33     | 609    |
| Nigeria          | Abuja              | 2/28/20 | 2,170   | 68     | 51     |

|                          |                           |         |           |        |        |
|--------------------------|---------------------------|---------|-----------|--------|--------|
| Macedonia                | Skopje                    | 2/27/20 | 1,494     | 81     | 148    |
| Northern Mariana Islands | Saipan                    | 3/31/20 | 14        | 2      | 14     |
| Norway                   | Oslo                      | 2/27/20 | 7,759     | 204    | 2,566  |
| Oman                     | Muscat                    | 2/25/20 | 2,447     | 11     | 55     |
| Pakistan                 | Islamabad                 | 2/27/20 | 18,114    | 417    | 991    |
| Palestine                |                           | 3/6/20  | 517       | 4      | 134    |
| Panama                   | Panama City               | 3/10/20 | 6,720     | 192    | 1,988  |
| Papua New Guinea         | Port Moresby              | 3/21/20 | 8         | 0      | 7      |
| Paraguay                 | Asunción                  | 3/8/20  | 333       | 10     | 96     |
| Peru                     | Lima                      | 3/7/20  | 40,459    | 1,124  | 1,414  |
| Philippines              | Manila                    | 1/30/20 | 8,772     | 579    | 3      |
| Poland                   | Warsaw                    | 3/4/20  | 13,105    | 651    | 2,055  |
| Portugal                 | Lisbon                    | 3/3/20  | 25,351    | 1,007  | 5,962  |
| Puerto Rico              | San Juan                  | 3/28/20 | 1,575     | 94     | 1,252  |
| Qatar                    | Doha                      | 3/1/20  | 14,096    | 12     | 562    |
| Romania                  | Bucharest                 | 2/27/20 | 12,567    | 744    | 762    |
| Russia                   | Moscow                    | 2/1/20  | 114,431   | 1,169  | 2      |
| Rwanda                   | Kigali                    | 3/15/20 | 249       | 0      | 118    |
| Saint Kitts              | Basseterre                | 3/26/20 | 15        | 0      | 15     |
| Saint Lucia              | Castries                  | 3/15/20 | 17        | 0      | 15     |
| Saint Vincent            | Kingstown                 | 3/13/20 | 16        | 0      | 8      |
| San Marino               | San Marino                | 2/28/20 | 580       | 41     | 208    |
| Sao Tome and Principe    | São Tomé                  | 4/9/20  | 18        | 1      |        |
| Saudi Arabia             | Riyadh                    | 3/3/20  | 24,097    | 169    | 1,229  |
| Senegal                  | Dakar                     | 3/3/20  | 1,024     | 9      | 142    |
| Serbia                   | Belgrade                  | 3/7/20  | 9,205     | 185    | 1,171  |
| Seychelles               | Victoria                  | 3/15/20 | 11        | 0      | 10     |
| Sierra Leone             | Freetown                  | 4/1/20  | 136       | 7      | 99     |
| Singapore                | Singapore                 | 1/24/20 | 17,101    | 16     | 84     |
| Sint Maarten             | Philipsburg               | 3/3/20  | 76        | 13     | 3      |
| Slovakia                 | Bratislava                | 3/7/20  | 1,403     | 23     | 426    |
| Slovenia                 | Ljubljana                 | 3/5/20  | 1,434     | 93     | 814    |
| Somalia                  | Mogadishu                 | 3/17/20 | 601       | 28     | 25     |
| South Africa             | Pretoria                  | 3/6/20  | 5,951     | 116    | 1,380  |
| South Korea              | Seoul                     | 1/20/20 | 10,780    | 250    | 29     |
| South Sudan              | Juba                      | 4/6/20  | 45        | 0      |        |
| Spain                    | Madrid                    | 2/1/20  | 215,216   | 24,824 | 25     |
| Sri Lanka                | Sri Jayawardenepura Kotte | 1/28/20 | 690       | 7      | 1      |
| Sudan                    | Khartoum                  | 3/14/20 | 442       | 31     | 14     |
| Suriname                 | Paramaribo                | 3/15/20 | 10        | 1      | 10     |
| Sweden                   | Stockholm                 | 2/1/20  | 21,520    | 2,653  | 7      |
| Switzerland              | Bern                      | 2/26/20 | 29,622    | 1,434  | 8,015  |
| Syria                    | Damascus                  | 3/23/20 | 44        | 3      | 38     |
| Taiwan                   | Taipei                    | 1/21/20 | 429       | 6      | 20     |
| Tanzania                 | Dodoma (official)         | 3/17/20 | 480       | 16     | 32     |
| Thailand                 | Bangkok                   | 1/13/20 | 2,960     | 54     | 32     |
| Togo                     | Lomé                      | 3/7/20  | 123       | 9      | 39     |
| Trinidad                 | Port of Spain             | 3/13/20 | 116       | 8      | 107    |
| Tunisia                  | Tunis                     | 3/3/20  | 998       | 41     | 278    |
| Turkey                   | Ankara                    | 3/12/20 | 122,392   | 3,258  | 34,109 |
| Turks and Caicos Islands |                           | 3/25/20 | 12        | 1      | 11     |
| U.S. Virgin Islands      | Charlotte Amalie          | 3/24/20 | 66        | 4      | 53     |
| United Arab Emirates     | Abu Dhabi                 | 1/27/20 | 13,038    | 111    | 13     |
| Uganda                   | Kampala                   | 3/22/20 | 85        | 0      | 55     |
| Ukraine                  | Kiev                      | 3/4/20  | 11,411    | 279    | 480    |
| United Kingdom           | London                    | 1/31/20 | 177,454   | 27,510 | 13     |
| United States            | Washington, D.C.          | 1/21/20 | 1,103,781 | 65,068 | 15     |
| Uruguay                  | Montevideo                | 3/15/20 | 648       | 17     | 446    |
| Uzbekistan               | Tashkent                  | 3/16/20 | 2,094     | 9      | 796    |
| Vatican                  | Vatican City              | 3/7/20  | 11        | 0      | 6      |
| Venezuela                | Caracas                   | 3/15/20 | 335       | 10     | 175    |
| Vietnam                  | Hanoi                     | 1/24/20 | 270       | 0      | 16     |
| Yemen                    | Sana'a                    | 4/10/20 | 7         | 2      |        |
| Zambia                   | Lusaka                    | 3/19/20 | 109       | 3      | 45     |
| Zimbabwe                 | Harare                    | 3/21/20 | 34        | 4      | 24     |

**Supplementary Table 1. List of countries and territories, capital cities, date of first reported COVID-19 case, total cases, total deaths, and cumulative cases at 28 days.**
